# Supplementary material for: Invasive Streptococcus suis isolated in Spain contain a highly promiscuous and dynamic resistome
Source: PubMed Central journal article supplement (PMC10839070; doi:10.3389/fcimb.2023.1329632), 2024-01-22
Supplement: Table_2.pdf [file Table_2.pdf]

**Table S2. Primers used in this study.** Sequence, temperature of annealing ( $T_A$ ), expected product size and reference are indicated.

| Primer                                      | Forward (3'-5')            | Reverse (3'-5')           | $T_A$ | Product size (bp) | Putative gene                       | Reference                     |
|---------------------------------------------|----------------------------|---------------------------|-------|-------------------|-------------------------------------|-------------------------------|
| <b>Detection/amplification of AMR genes</b> |                            |                           |       |                   |                                     |                               |
| aphA3                                       | GGCTAAAATGAGAATATCACCGG    | CTTTAAAAAATCATACAGCTCGCG  | 47    | 526               | <i>aph(3')</i> -IIIa                | (Vakulenko et al., 2003)      |
| ant1                                        | AATTTCTGGCTCCGTAGGCTG      | CCCATTTTGC GGCAACATCT     |       | 410               | <i>ant1</i>                         | This study                    |
| aacA                                        | TAATCCAAGAGCAATAAGGGC      | GCCACACTATCATAACCACTA     | 55    | 228               | <i>aacA</i>                         | (Strommen ger et al., 2003)   |
| aadE                                        | TAAGTGATATAGAACC GTTTAT    | CAAATATTTTCATAGGAATCC     | 44    | 568               | <i>aadE</i>                         | This study                    |
| ant9                                        | CGGTCAGCTTTATTGAACAG       | TAATTCACAAGAGGACGCT       | 55    | 989               | <i>ant(9')</i> -Ia                  | (Mahbub Alam 2005)            |
| aac6-aph2                                   | CAGAGCCTTGGGAAGATGAAG      | CCTCGTGTAATTCATGTTCTGGC   | 55    | 348               | <i>aac(6')</i> -Ie- <i>aph(2'')</i> | (Vakulenko et al., 2003)      |
| sat4                                        | AAAACCGGCTGCCTGGATAG       | TCGACGGAGCCGATTTTGAA      | 55    | 532               | <i>sat4</i>                         | This study                    |
| spw                                         | GGCAGTAATGGGTGGTTTACG      | CCCATTACAGCTGCCAGATCT     | 55    | 521               | <i>spw</i>                          | This study                    |
| apmA                                        | CGCGAGGTAGTTGTATGGGG       | TATAGCACCGTCCACCGATGC     | 55    | 567               | <i>apmA</i>                         | This study                    |
| aph2                                        | CAAAAGATCGACTGGCGCTG       | TCGCACCAAAAATGTTGGCC      | 55    | 576               | <i>aph(2'')</i> -IIIa               | This study                    |
| pbp2x                                       | ATACGACAATTTACGCCGAT       | TTAATTCAGCACCGTTTCC       | 55    | 1219              | <i>pbp2x</i>                        | This study                    |
| pbp2b                                       | GCTGATTTAGCCTTTCAAGATG     | AGCCTCCTTAATTCATTGGG      | 55    | 1127              | <i>pbp2b</i>                        | This study                    |
| pbp1a                                       | GCGTGAATATCTACAATACAGA     | ACGATTGGTATATCCGGTCC      | 55    | 894               | <i>pbp1a</i>                        | This study                    |
| mraY                                        | CGTTGAATAACCACTCCATAT      | TCGGTACCGCTTTGAATAAA      | 55    | 1191              | <i>mraY</i>                         | This study                    |
| fexA                                        | GCGTCAATCCCGTACTTCCACT     | CTGCGGCGTTATTTGCGGGA      | 55    | 1065              | <i>fexA</i>                         | This study                    |
| optrA                                       | AGGTGGTCAGCGAACTAA         | ATCAACTGTTCCCATTC         | 55    | 1395              | <i>optrA</i>                        | (Wang et al., 2015)           |
| gyrA                                        | AGGGGATGTTATGGGTAAT        | GTGAATTCAGATTTCCCAT       | 55    | 481               | <i>gyrA</i>                         | This study                    |
| parC                                        | CTTGAGGACATCATGGGAGAG      | TTCCGTATCGTCAAAGTCC       | 55    | 423               | <i>parC</i>                         | This study                    |
| ermB                                        | GCAGTGACTAATCTTATGACTTTT   | CTGTGGTATGGCGGGTAAGT      | 63    | 621               | <i>erm(B)</i>                       | (Malhotra-Kumar et al., 2005) |
| mefA-E                                      | CAATATGGGCAGGGCAAG         | AAGCTGTTCCAATGCTACGG      | 62    | 315               | <i>mef(A/E)</i>                     | (Malhotra-Kumar et al., 2005) |
| mrsD                                        | CCTTATCGGCACAGGTTTAT       | GAATGCCTTCCGGAGCTTC       |       | 489               | <i>mrs(D)</i>                       | (Lüthje et al., 2007)         |
| erm47                                       | GTGAATCTAATGATGTTTAA       | ATGGATAGAATTTGATCAA       | 55    | 623               | <i>erm(47)</i>                      | This study                    |
| mphB                                        | ATTAACAAGTAATCGAGATAGC     | TTTGCCATCTGCTCATATTCC     | 50    | 869               | <i>mph(B)</i>                       | (Achard et al., 2008)         |
| mphC                                        | GAGACTACCAAGAAGACCTGACG    | CATACGCCGATTCTCCTGAT      | 59    | 722               | <i>mph(C)</i>                       | (Lüthje et al., 2007)         |
| cfr                                         | TGAAGTATAAAGCAGGTTGGGAGTCA | ACCATATAATTGACCACAAGCAGC  | 48    | 748               | <i>cfr</i>                          | (Kehrenber g et al., 2006)    |
| lnuB                                        | CGTGGGAATTTTCAATTCCTTTC    | CGTTGATTCCCATCAACCATAG    | 56    | 226               | <i>lnu(B)</i>                       | (Bojarska et al., 2016)       |
| lsaE                                        | TATGCGTATTCGGCAATATAAG     | AACGGCTTCTGATGTCTTG       | 56    | 681               | <i>lsa(E)</i>                       | (Bojarska et al., 2016)       |
| vgaF                                        | TGTATTCAATTAGAGAAGGA       | GATTTTCAAAAAAGTAGACT      | 55    | 129               | <i>vga(F)</i>                       | This study                    |
| dhfr                                        | CCTACTTGGAAGTGCATTTT       | GCGTAGGTTTTTATTGTAATAATCA | 55    | 558               | <i>dhfr</i>                         | This study                    |
| tetO                                        | AACTTAGGCATTCTGGCTCAC      | TCCCACTGTTCCATATCGTCA     | 61    | 515               | <i>tet(O)</i>                       | (Malhotra-Kumar et al., 2005) |
| tetM                                        | AGAACTCGAACAAGAGGAAA       | ATGGAAGCCCAGAAAGGAT       | 60    | 471               | <i>tet(M)</i>                       | (Olsvik et al., 1995)         |
| tetT                                        | AATCTTGCAATAATGCAATCA      | TGGATTACTGCTTTAGAGTTTC    | 55    | 869               | <i>tet(T)</i>                       | This study                    |
| tetL                                        | TGGTGAATGATAGCCCAT         | CAGGAATGACAGCACGCTAA      | 62    | 229               | <i>tet(L)</i>                       | (Malhotra-Kumar et al., 2005) |
| tetK                                        | GATCAATTGTAGCTTTAGGTGAAGG  | TTTTGTTGATTTACCAGGTACCATT | 62    | 155               | <i>tet(K)</i>                       | (Malhotra-Kumar et al., 2005) |
| tetW                                        | GGAGGAAAATACCGACATA        | AATCTTACAGTCCGTTACG       | 60    | 1000              | <i>tet(W)</i>                       | (Patterson et al., 2007)      |
| tet40                                       | CGGAGGAAGAGGACAAACCC       | TAAGCCCGTGGCGATAAGAC      | 56    | 446               | <i>tet(40)</i>                      | (Chen et al., 2013)           |
| tet44                                       | GGTATCTTGCTCATGTAG         | TCCATGGTATATAGGAAACA      |       | 639               | <i>tet(44)</i>                      | This study                    |

|                              |                             |                          |    |      |               |                       |
|------------------------------|-----------------------------|--------------------------|----|------|---------------|-----------------------|
| tetW-Fw / tetM-Rev*2         | GGAGGAAAATACCGACATA         | ATGGAAGCCCAGAAAGGAT      | 60 | 834  | tet(O/W/32/O) | (Olsvik et al., 1995) |
| <b>External to AMR genes</b> |                             |                          |    |      |               |                       |
| spw_EXT                      | GGTGGCTCAAACATATAATAAAC     | GAGTTGATGGCATTGATGT      | 55 | 1112 | spw           | This study            |
| pbp2x-mraY_EXT               | AGAGATTGATGGGATTTGTTATGATTT | CGACAAATTCGCCATTTTTCATTT | 55 | 6373 | pbp2x-mraY    | This study            |
| pbp1a_EXT                    | TTCCCCAGCATCCCATATCT        | CGCTTTCCTCGGTAATAGCTG    | 55 | 2435 | pbp1a         | This study            |
| pbp2b_EXT                    | TCTGTCTAAAAAATATTTTTGCCT    | pbp2b-Rev                | 55 | 2150 | pbp2b         | This study            |
| fexA-optrA_EXT               | ATGAAAAAGGATAGTAAATC        | GCGATTATATCTAATAAAAAATTC | 55 | 4176 | fexA-optrA    | This study            |
| gyrA_EXT                     | ATTGACTGGACGAACGATAC        | GGCGATAATTATCTACCAAAGC   | 55 | 5494 | gyrA          | This study            |
| ermB_EXT                     | GCGCAATCTTATGACTTTTTAAACAGA | AGTAACGTGTAACCTTCCAAATTT | 55 | 876  | erm(B)        | This study            |
| <b>Sequencing</b>            |                             |                          |    |      |               |                       |
| pbp2x_Seq                    | TTATGCAAACGCGGCTTTT         |                          | -  | -    | pbp2x         | This study            |
| pbp2x-mraY_Seq1              | CAATAATCGTGCCCATTC          | GCAAGTCTTTTGGCAGGC       | -  | -    | pbp2x-mraY    | This study            |
| pbp2x-mraY_Seq2              | AATGGAAATTTTGCTTCA          | GAAAATCTTCGCTGGTTT       | -  | -    | pbp2x-mraY    | This study            |
| pbp2x-mraY_Seq3              | TGGTATGATGTTAGAGCC          | GTAGGAGTCCGGCCTTG        | -  | -    | pbp2x-mraY    | This study            |
| pbp1a_Seq                    | CAAGAGATTTTGACCTACT         |                          | -  | -    | pbp1a         | This study            |
| gyrA_Seq                     |                             | AACTTCTGGCTCACGCTCAC     | -  | -    | gyrA          | This study            |
| fexA_Seq                     | TCAATAACAAGGATTATG          | CAGCAGTTCCAACACCAA       | -  | -    | fexA          | This study            |
| optrA_Seq1                   | GGTGAAGCTAAAACCTTA          | ATGTAGATTATAACTTC        | -  | -    | optrA         | This study            |
| optrA_Seq2                   | TTAAAGTTGAGCAGAAAG          |                          | -  | -    | optrA         | This study            |

TA: Annealing temperature, Fw: Forward, Rev: Reverse, EXT: exterior, Seq: Sequencing.

## References

Achard, A., Guérin-Faubleé, V., Pichereau, V., Villers, C., Leclercq, R. (2008). Emergence of macrolide resistance gene *mph(B)* in *Streptococcus uberis* and cooperative effects with *rdmC*-like gene. *Antimicrob. Agents Chemother.* 52 (8), 2767–2770. doi: 10.1128/AAC.00481-08.

Bojarska, A., Molska, E., Janas, K., Skoczyńska, A., Stefaniuk, E., Hryniewicz, W., et al. (2016). *Streptococcus suis* in invasive human infections in Poland: clonality and determinants of virulence and antimicrobial resistance. *Eur. J. Clin. Microbiol. Infect. Dis.* 35 (6), 917–925. doi: 10.1007/s10096-016-2616-x.

Chen, L., Song, Y., Wei, Z., He, H., Zhang, A., Jin, M. (2013). Antimicrobial susceptibility, tetracycline and erythromycin resistance genes, and multilocus sequence typing of *Streptococcus suis* isolates from diseased pigs in China. *J. Vet. Med. Sci.* 75 (5), 583–587. doi: 10.1292/jvms.12-0279.

Kehrenberg, C., Schwarz, S. (2006). Distribution of florfenicol resistance genes *fexA* and *cfr* among chloramphenicol-resistant *Staphylococcus* isolates. *Antimicrob. Agents Chemother.* 50 (4), 1156–1163. doi: 10.1128/AAC.50.4.1156-1163.2006.

Lüthje, P., Schwarz, S. (2007). Molecular basis of resistance to macrolides and lincosamides among staphylococci and streptococci from various animal sources collected in the resistance monitoring program BfT-GermVet. *Int. J. Antimicrob. Agents.* 29 (5), 528–535. doi: 10.1016/j.ijantimicag.2006.

Mahbub Alam, M., Kobayashi, N., Ishino, M., Sumi, A., Kobayashi, K.I., Uehara, N., et al. (2005). Detection of a novel *aph(2'')* allele (*aph[2'']-Ie*) conferring high-level gentamicin resistance and a

spectinomycin resistance gene *ant(9)-Ia (aad9)* in clinical isolates of enterococci. *Microb. Drug Resist.* 11 (3), 239–247. doi: 10.1089/mdr.2005.11.239.

Malhotra-Kumar, S., Lammens, C., Piessens, J., Goossens, H. (2005). Multiplex PCR for simultaneous detection of macrolide and tetracycline resistance determinants in streptococci. *Antimicrob. Agents Chemother.* 49 (11), 4798–4800. doi: 10.1128/AAC.49.11.4798-4800.2005.

Olsvik, B., Olsen, I., Tenover, F.C. (1995). Detection of *tet(M)* and *tet(Q)* using the polymerase chain reaction in bacteria isolated from patients with periodontal disease. *Oral Microbiol. Immunol.* 10 (2), 87–92. doi: 10.1111/j.1399-302x.1995.tb00124.x.

Patterson, A.J., Rincon, M.T., Flint, H.J., Scott, K.P. (2007). Mosaic tetracycline resistance genes are widespread in human and animal fecal samples. *Antimicrob. Agents Chemother.* 51 (3), 1115–1118. doi: 10.1128/AAC.00725-06.

Strommenger, B., Kettlitz, C., Werner, G., Witte, W. (2003). Multiplex PCR assay for simultaneous detection of nine clinically relevant antibiotic resistance genes in *Staphylococcus aureus*. *J. Clin. Microbiol.* 41 (9), 4089–4094. doi: 10.1128/JCM.41.9.4089-4094.2003.

Vakulenko, S.B., Donabedian, S.M., Voskresenskiy, A.M., Zervos, M.J., Lerner, S.A., Chow, J.W. (2003). Multiplex PCR for detection of aminoglycoside resistance genes in enterococci. *Antimicrob. Agents Chemother.* 47 (4), 1423–1426. doi: 10.1128/AAC.47.4.1423-1426.2003.

Wang, Y., Lv, Y., Cai, J., Schwarz, S., Cui, L., Hu, Z., et al. (2015). A novel gene, *optrA*, that confers transferable resistance to oxazolidinones and phenicols and its presence in *Enterococcus faecalis* and *Enterococcus faecium* of human and animal origin. *J. Antimicrob. Chemother.* 70 (8), 2182–2190. doi: 10.1093/jac/dkv116.
